# Supplementary material for: Cocrystal of Codeine and Cyclopentobarbital
Source: Preprints.org preprint supplement (doi:10.20944/preprints202308.0247.v1), 2023-08-03

---

The following ALERTS were generated. Each ALERT has the format

**test-name\_ALERT\_alert-type\_alert-level.**

Click on the hyperlinks for more details of the test.

---

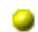

### Alert level C

STRVA01\_ALERT\_4\_C                      Flack parameter is too small  
                    From the CIF: \_refine\_ls\_abs\_structure\_Flack    -0.300  
                    From the CIF: \_refine\_ls\_abs\_structure\_Flack\_su    0.300  
PLAT018\_ALERT\_1\_C \_diffn\_measured\_fraction\_theta\_max .NE. \*\_full                      ! Check  
PLAT089\_ALERT\_3\_C Poor Data / Parameter Ratio (Zmax < 18) .....                      6.77 Note  
PLAT340\_ALERT\_3\_C Low Bond Precision on C-C Bonds .....                      0.00596 Ang.  
PLAT911\_ALERT\_3\_C Missing FCF Refl Between Thmin & STh/L=                      0.596                      18 Report

---

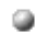

### Alert level G

PLAT002\_ALERT\_2\_G Number of Distance or Angle Restraints on AtSite                      15 Note  
PLAT003\_ALERT\_2\_G Number of Uiso or Uij Restrained non-H Atoms ...                      9 Report  
PLAT032\_ALERT\_4\_G Std. Uncertainty on Flack Parameter Value High .                      0.300 Report  
PLAT172\_ALERT\_4\_G The CIF-Embedded .res File Contains DFIX Records                      4 Report  
PLAT175\_ALERT\_4\_G The CIF-Embedded .res File Contains SAME Records                      1 Report  
PLAT176\_ALERT\_4\_G The CIF-Embedded .res File Contains SADI Records                      2 Report  
PLAT178\_ALERT\_4\_G The CIF-Embedded .res File Contains SIMU Records                      1 Report  
PLAT188\_ALERT\_3\_G A Non-default SIMU Restraint Value has been used                      0.0100 Report  
PLAT189\_ALERT\_3\_G A Non-default SAME Restraint Value for First Par                      0.0100 Report  
PLAT191\_ALERT\_3\_G A Non-default SADI Restraint Value has been used                      0.0100 Report  
PLAT191\_ALERT\_3\_G A Non-default SADI Restraint Value has been used                      0.0100 Report  
PLAT300\_ALERT\_4\_G Atom Site Occupancy of C11B                      Constrained at                      0.65 Check  
PLAT300\_ALERT\_4\_G Atom Site Occupancy of C12B                      Constrained at                      0.65 Check  
PLAT300\_ALERT\_4\_G Atom Site Occupancy of C13B                      Constrained at                      0.65 Check  
PLAT300\_ALERT\_4\_G Atom Site Occupancy of C14B                      Constrained at                      0.65 Check  
PLAT300\_ALERT\_4\_G Atom Site Occupancy of C11C                      Constrained at                      0.35 Check  
PLAT300\_ALERT\_4\_G Atom Site Occupancy of C12C                      Constrained at                      0.35 Check  
PLAT300\_ALERT\_4\_G Atom Site Occupancy of C13C                      Constrained at                      0.35 Check  
PLAT300\_ALERT\_4\_G Atom Site Occupancy of C14C                      Constrained at                      0.35 Check  
PLAT300\_ALERT\_4\_G Atom Site Occupancy of H10C                      Constrained at                      0.65 Check  
PLAT300\_ALERT\_4\_G Atom Site Occupancy of H11B                      Constrained at                      0.65 Check  
PLAT300\_ALERT\_4\_G Atom Site Occupancy of H12B                      Constrained at                      0.65 Check  
PLAT300\_ALERT\_4\_G Atom Site Occupancy of H13A                      Constrained at                      0.65 Check  
PLAT300\_ALERT\_4\_G Atom Site Occupancy of H13B                      Constrained at                      0.65 Check  
PLAT300\_ALERT\_4\_G Atom Site Occupancy of H14B                      Constrained at                      0.65 Check  
PLAT300\_ALERT\_4\_G Atom Site Occupancy of H14C                      Constrained at                      0.65 Check  
PLAT300\_ALERT\_4\_G Atom Site Occupancy of H10D                      Constrained at                      0.35 Check  
PLAT300\_ALERT\_4\_G Atom Site Occupancy of H11C                      Constrained at                      0.35 Check  
PLAT300\_ALERT\_4\_G Atom Site Occupancy of H12C                      Constrained at                      0.35 Check  
PLAT300\_ALERT\_4\_G Atom Site Occupancy of H13C                      Constrained at                      0.35 Check  
PLAT300\_ALERT\_4\_G Atom Site Occupancy of H13D                      Constrained at                      0.35 Check  
PLAT300\_ALERT\_4\_G Atom Site Occupancy of H14D                      Constrained at                      0.35 Check  
PLAT300\_ALERT\_4\_G Atom Site Occupancy of H14E                      Constrained at                      0.35 Check  
PLAT302\_ALERT\_4\_G Anion/Solvent/Minor-Residue Disorder (Resd 2 )                      24% Note  
PLAT398\_ALERT\_2\_G Deviating C-O-C Angle From 120 for O3A                      .                      107.3 Degree  
PLAT480\_ALERT\_4\_G Long H...A H-Bond Reported H17C                      ..02B                      .                      2.64 Ang.  
PLAT720\_ALERT\_4\_G Number of Unusual/Non-Standard Labels .....                      5 Note  
PLAT860\_ALERT\_3\_G Number of Least-Squares Restraints .....                      133 Note  
PLAT909\_ALERT\_3\_G Percentage of I>2sig(I) Data at Theta(Max) Still                      59% Note  
PLAT910\_ALERT\_3\_G Missing # of FCF Reflection(s) Below Theta(Min).                      1 Note

|                   |                                                  |     |      |
|-------------------|--------------------------------------------------|-----|------|
| PLAT933_ALERT_2_G | Number of HKL-OMIT Records in Embedded .res File | 3   | Note |
| PLAT941_ALERT_3_G | Average HKL Measurement Multiplicity .....       | 3.4 | Low  |
| PLAT978_ALERT_2_G | Number C-C Bonds with Positive Residual Density. | 4   | Info |

---

0 **ALERT level A** = Most likely a serious problem - resolve or explain  
0 **ALERT level B** = A potentially serious problem, consider carefully  
5 **ALERT level C** = Check. Ensure it is not caused by an omission or oversight  
43 **ALERT level G** = General information/check it is not something unexpected

1 ALERT type 1 CIF construction/syntax error, inconsistent or missing data  
5 ALERT type 2 Indicator that the structure model may be wrong or deficient  
11 ALERT type 3 Indicator that the structure quality may be low  
31 ALERT type 4 Improvement, methodology, query or suggestion  
0 ALERT type 5 Informative message, check

---

It is advisable to attempt to resolve as many as possible of the alerts in all categories. Often the minor alerts point to easily fixed oversights, errors and omissions in your CIF or refinement strategy, so attention to these fine details can be worthwhile. In order to resolve some of the more serious problems it may be necessary to carry out additional measurements or structure refinements. However, the purpose of your study may justify the reported deviations and the more serious of these should normally be commented upon in the discussion or experimental section of a paper or in the "special\_details" fields of the CIF. checkCIF was carefully designed to identify outliers and unusual parameters, but every test has its limitations and alerts that are not important in a particular case may appear. Conversely, the absence of alerts does not guarantee there are no aspects of the results needing attention. It is up to the individual to critically assess their own results and, if necessary, seek expert advice.

### Publication of your CIF in IUCr journals

A basic structural check has been run on your CIF. These basic checks will be run on all CIFs submitted for publication in IUCr journals (*Acta Crystallographica*, *Journal of Applied Crystallography*, *Journal of Synchrotron Radiation*); however, if you intend to submit to *Acta Crystallographica Section C* or *E* or *IUCrData*, you should make sure that full publication checks are run on the final version of your CIF prior to submission.

### Publication of your CIF in other journals

Please refer to the *Notes for Authors* of the relevant journal for any special instructions relating to CIF submission.

---

**PLATON version of 10/05/2023; check.def file version of 10/05/2023**

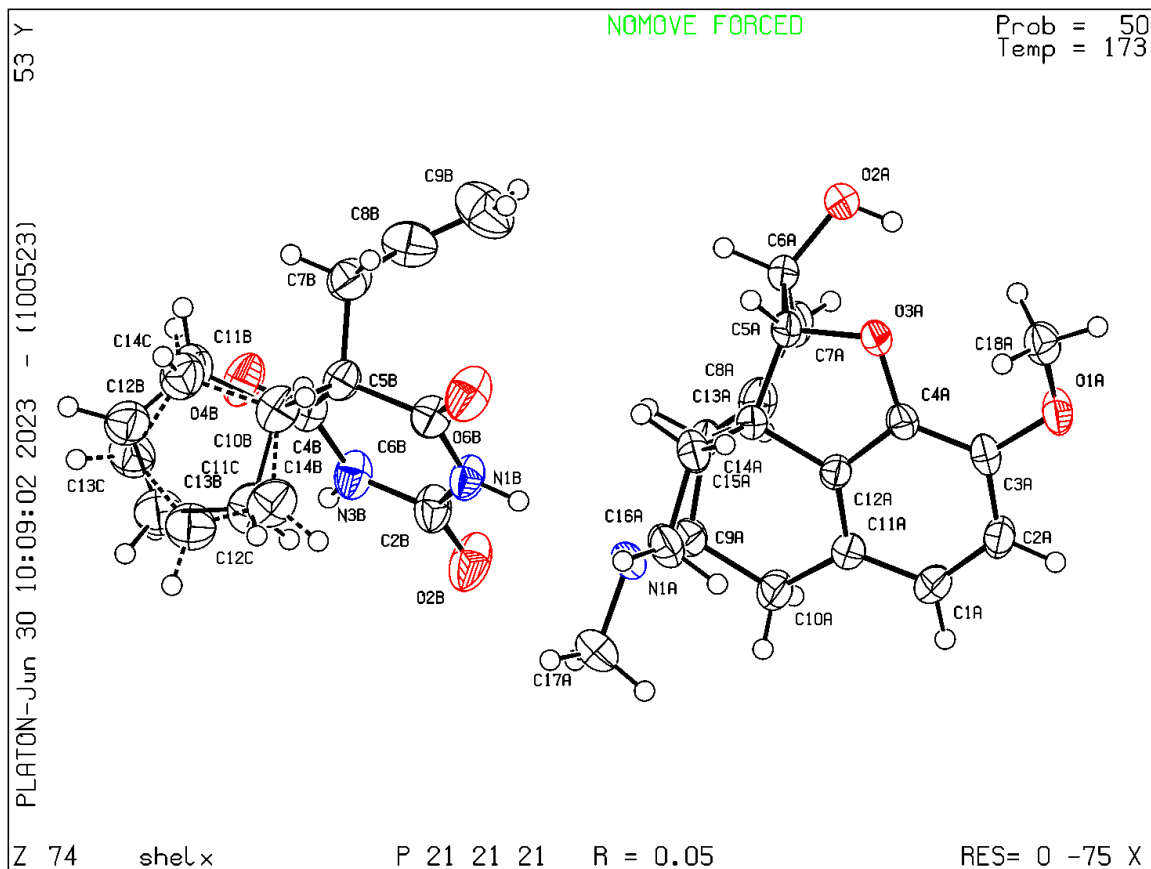

Supplement: Supplementary file 2 [file supplementary]
